# Supplementary material
Source: Springer Nature journal article supplement (https://www.springermedizin.de/resource/supplementary/12885_2011_2909_MOESM4_ESM.pdf/9462266)

Relative expression

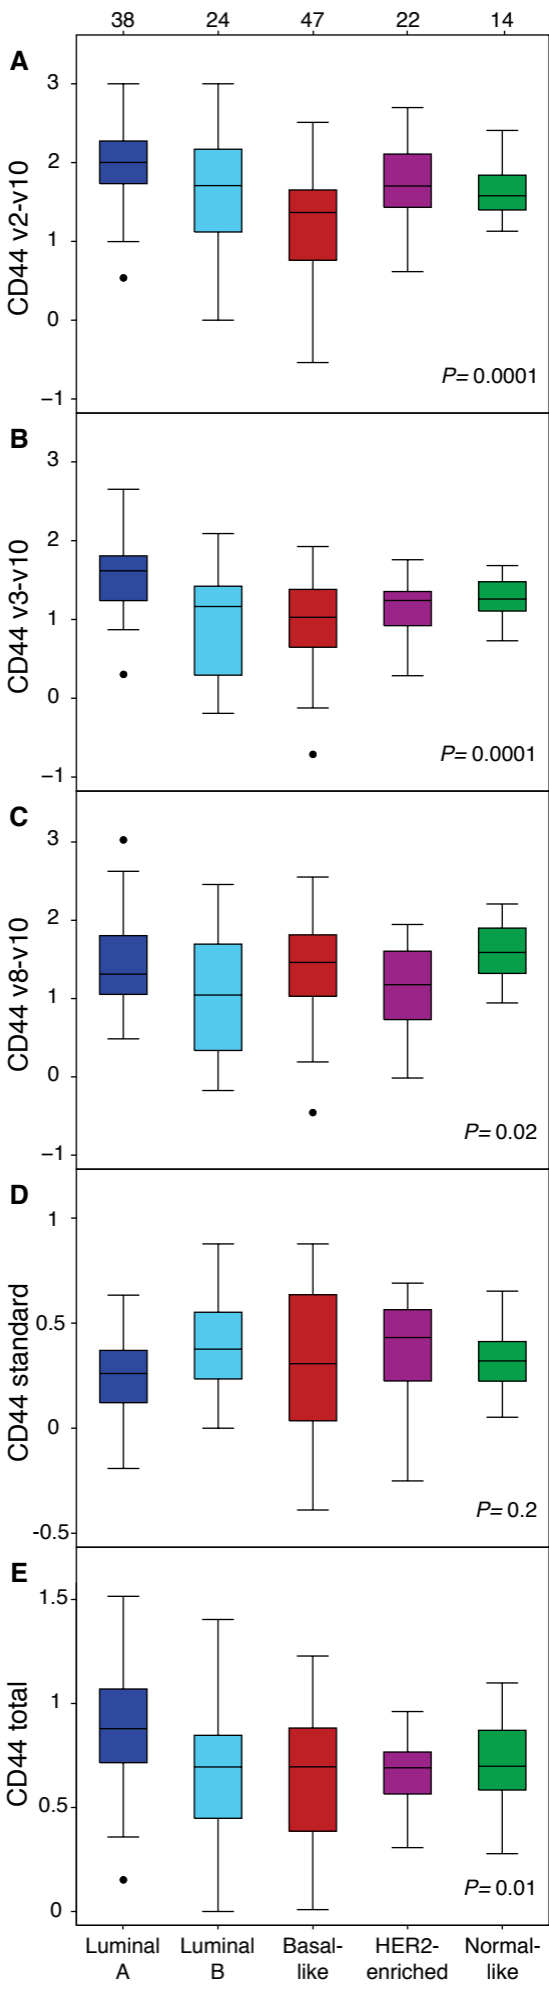

Supplement: MOESM4 [file 9462266]
